**Submission type:** Original article

**Subject category:** Microbial population and community ecology

**Title: Inoculation with highly-related mycorrhizal fungal siblings, and their interaction with plant genotypes, strongly shapes tropical mycorrhizal fungal community structure**

5

**Authors:** Yuli Marcela Ordoñez<sup>1\*</sup>, Lucas Villard<sup>2\*</sup>, Isabel Ceballos<sup>1</sup>, Frédéric G. Masclaux<sup>2,3</sup>, Alia Rodriguez<sup>1§</sup>, Ian R. Sanders<sup>2§</sup>

<sup>1</sup>*Biology Department, Faculty of Science, Universidad Nacional de Colombia, Ciudad*

10 *Universitaria - Avenida Carrera 30 N° 45-03, Bogotá, Colombia*

<sup>2</sup>*Department of Ecology and Evolution, Biophore Building, University of Lausanne, 1015 Lausanne, Switzerland*

<sup>3</sup>*Vital-IT Group, Swiss Institute of Bioinformatics, 1015 Lausanne, Switzerland*

15 \* These authors contributed equally to this work.

§ These authors are joint senior authors on this work.

**Running title:** *Mycorrhizal fungal communities*

**Corresponding author:** I. R. Sanders, Department of Ecology and Evolution, University of Lausanne, Biophore building, 1015 Lausanne, Switzerland

20 E-mail: [ian.sanders@unil.ch](mailto:ian.sanders@unil.ch)

**Conflict of interest:** The authors declare no conflict of interest

## Abstract

Arbuscular mycorrhizal fungi (AMF) have the potential to increase crop yields and all  
25 globally important crops form the mycorrhizal symbiosis. Only a few studies have  
investigated the impact of introduced AMF on local AMF communities and most  
studies have only investigated effects of one isolate. We studied the impact on AMF  
community structure of inoculating roots of the globally important crop cassava with  
highly genetically-related clonal siblings of two genetically different *Rhizophagus*  
30 *irregularis* isolates. We hypothesized that inoculation with *R. irregularis* siblings  
differentially influences the structure and the diversity of the pre-existing AMF  
community colonizing cassava. Alpha and beta taxonomic and phylogenetic AMF  
diversity were strongly and significantly altered differentially following inoculation  
with sibling AMF progeny. In most cases, the effects were also cassava-genotype  
35 specific. Although biomass production and AMF colonization were also both  
differentially affected by inoculation with sibling *R. irregularis* progeny these  
variables were not correlated with changes in the AMF community structure. The  
results highlight that investigations on the impact of an introduced AMF species, that  
use only one isolate, are unlikely to be representative of the overall effects of that  
40 AMF species and that the genetic identity of the host must be considered. The amount  
of inoculum added was very small and effects were observed 12 months following  
inoculation. That such a small amount of almost genetically identical fungal inoculum  
can strongly differentially influence AMF community structure 12 months following  
inoculation, indicates that AMF communities in tropical soils are not very resistant to  
45 perturbation.

*Mycorrhizal fungal communities*

**Keywords:** *Rhizophagus irregularis*/ mycorrhizal symbiosis/ cassava/ mycorrhiza communities/ community structure

## Introduction

The majority of plants form symbiotic associations with arbuscular mycorrhizal fungi  
50 (AMF) in almost all terrestrial ecosystems. These important fungal symbionts,  
belonging to the subphylum Glomeromycotina, have an enormous potential to  
increase crop yields on a global scale because they have the potential to improve plant  
growth and because all globally important crop plants form the mycorrhizal symbiosis  
[1]. Thus, these fungi could be very important in helping to feed the rapidly growing  
55 human population.

Arbuscular mycorrhizal fungi have sometimes proved effective for increasing food  
production, particularly in the case of cassava; an important food security crop that  
feeds nearly 1 billion people daily in the tropics [2, 3]. The arbuscular mycorrhizal  
fungal species *Rhizophagus irregularis* can be produced *in vitro*, thus, free of  
60 unwanted microorganisms, and can be highly concentrated into an easy-to-transport  
product. This fungus is commonly found in agricultural soils around the world, and  
indistinguishable genotypes of this fungus are distributed across wide geographical,  
edaphic and climatic areas on different continents, indicating that it is well adapted to  
many different environmental conditions [4]. To date, only a handful of AMF are able  
65 to grow well in an *in vitro* culture system. Application of one *in vitro*-produced isolate  
of *Rhizophagus irregularis*, resulted in a 20% yield increase in cassava in tropical  
soils in Colombia [5].

*R. irregularis* has been shown to possess large intra-specific genetic differences [4, 6-  
9] and genetically different isolates induce differential growth responses in plants  
70 [10], including cassava [11]. *R. irregularis* isolates have been shown to exist in two  
states; as homokaryons, where all nuclei are identical, and as dikaryons, where the

*Mycorrhizal fungal communities*

fungus contains a population of two nucleus genotypes existing in a common cytoplasm. Production of clonal *in vitro* single spore sibling *R. irregularis* lines (SSSLs), originating from parental dikaryon AMF isolates, were shown to induce  
75 enormous variation in rice growth, with some SSSLs greatly increasing rice growth compared to the original parental isolate, even though they are likely to be products of clonal reproduction [12, 13]. Other studies on a dikaryon *R. irregularis* isolate (C3) also showed large differences in quantitative fungal traits among SSSLs [14]. This was thought to be due to the fact that clonal offspring spores originating from a  
80 dikaryon AMF parent can inherit unequal proportions of two nucleus genotypes [15]. Because of the inter-isolate and within-isolate genetic variation and its concurrent effects on plant growth, plus the fact that it can be grown *in vitro*, *R. irregularis* has been considered a potentially good candidate for an AMF improvement program [16]. Furthermore, more is known about the genome of this AMF species than any other  
85 AMF species. Such a use of improved *R. irregularis* lines would represent a fundamental change to the way that AMF inoculants are used [11].

The study by Angelard et al. 2010 [12] on variation in rice growth with AMF was conducted in sterile soil. However, in farming situations, AMF have to be applied to soil that naturally already contains an existing diverse AMF community and a diverse  
90 microbiome [1], meaning that while variation among SSSLs may induce variation in plant growth in sterile conditions, it may not translate into such impressive effects in the field. Therefore, two field trials were conducted in Colombia in order to investigate the potential of variation among *R. irregularis* SSSLs, on cassava production [11]. Two different varieties of cassava were each inoculated with two  
95 *Rhizophagus irregularis* lines, representing two genetically different parental isolates, known as C2 and C3. Isolate C2 is a homokarion and C3 is a dikaryon [17]. The plants

*Mycorrhizal fungal communities*

were also inoculated with 3 SSSLs of parental isolate C2 and 9 SSSLs of the parental isolate C3 [11]. The *R. irregularis* SSSLs originating from both parents induced large significant differences in cassava root production, with up to three-fold differences among plants inoculated with *R. irregularis* SSSLs originating from the same parent [11]. Isolate C2 and its progeny induced differential growth in both cassava cultivars but in a different way in each cultivar and isolate C3 and its progeny only induced differential growth in one cultivar (CM4574). The differential effects of the SSSLs lines was also dependent on the cassava cultivar. The effect of the *R. irregularis* lines on cassava production was reproducible in two trials in separate years [11].

Commercial AMF inoculants are often applied to soils from which those fungi were not isolated. Because the application of AMF inoculants to crops represents the addition of an AMF isolate to a pre-existing AMF community, it is important to understand the effects of this practice on the existing AMF community [18]. However, there is very limited empirical data from field inoculation trials on the effect of an introduced AMF on the diversity and structure of the local AMF community, especially in trials where AMF inoculation treatments actually led to strongly significant effects on crop growth. In two studies in temperate soils there was no effect on the existing AMF community of adding one *R. irregularis* isolate [19, 20]. In experimental microcosms with synthetic communities and field trials with a local AMF community, inoculation with *R. irregularis* suppressed most of the AMF taxa [21-23] and decreased AMF diversity [24]. All the studies used only one fungal isolate of an AMF species as inoculum.

The study by Ceballos et al. (2019) [11] is the only field trial to date showing significant and very large variation in the yields of a crop following inoculation with

*Mycorrhizal fungal communities*

single spore progeny derived from homokaryon and dikaryon AMF parents. Thus, there is currently no knowledge about whether variation among clonally produced single spore progeny could also alter local AMF communities.

If inoculation with SSSLs lines results in large variation in root growth, there is a  
125 strong rationale for expecting that a change in the local AMF community would occur. We propose that if more resources were allocated by the plants below-ground, following inoculation with a given SSSL, then this could also have significantly affected resource availability to the AMF community in the roots, as well as potentially affecting root exudation, and how many nutrients were removed from the  
130 soil. Thus, it is likely that the AMF in the different SSSL treatments experienced differential resource availability. It is well known that changes in resource availability greatly influence community diversity and structure [25, 26]. Thus, different levels of resources available to AMF, or the competitive ability between the introduced and pre-existing AMF taxa, could cause changes in local AMF community diversity and  
135 structure. We, therefore, expected that inoculation with SSSLs that induce differential growth responses in cassava will induce changes in the AMF community.

In first trial conducted by Ceballos et al 2019 we, therefore, investigated the effects of inoculation with *R. irregularis* SSSLs on the structure and diversity of the AMF community inside the roots of two varieties of field grown cassava in Colombia [11].  
140 We did not attempt to track the inoculated fungal isolates in the field because genetically very similar *R. irregularis*-like fungi already existed in the soil at the field site, thus, making it extremely difficult to distinguish those that were introduced from those that were already present. Given the observed effects of the SSSLs on variation in cassava root growth, we hypothesized that inoculation of cassava with *R.*

*Mycorrhizal fungal communities*

145 *irregularis* SSSLs influences the structure and/or the diversity of the pre-existing AMF community. Secondly, we hypothesized that the changes observed in the AMF community would be more pronounced in the cassava variety that showed a greater variation in growth response to the different *R. irregularis* SSSLs and where variation among SSSLs induced different levels of AMF colonization in the roots.

150



## Materials and methods

### *Field site*

The field experiment was conducted at the Utopía campus of La Salle University, Yopal, Department of Casanare, Colombia (72° 17' 48 W, 5° 19' 31'' N). The climate is tropical with average temperatures of 18°C (night) to 28°C (day), with an average air humidity of 75% and total annual precipitation of 2335 mm with 172 rain days. Physical and chemical soil properties are shown in Table S1.

### *Plant and fungal material*

We used cassava cultivars MCOL2737 and CM4574. These cultivars were selected because they are suitable for production in that region of Colombia and because MCOL2737 was used in previous experiments [5, 27].

We used two isolates of *R. irregularis* (C2 and C3) that we also refer to as parental isolates. The two fungi originate from an agricultural field in Switzerland and were subsequently put into *in vitro* culture in 2000 [6]. They have subsequently been maintained at the University of Lausanne. Each isolate was originally initiated with one spore. The SSSLs of C2 and C3 were raised *in vitro* in 2008 and then maintained in the same conditions by sub-culturing roots, hyphae and spores every 3-4 months. The SSSLs of parental C2 are referred to as C2.1, C2.2. and C2.3. The SSSLs of parental C3 are referred to as C3.1, C3.2, C3.3, C3.4, C3.5, C3.6, C3.7, C3.8 and C3.9. The SSSLs of C2 and C3 appear genetically identical to the parental fungus qualitatively, meaning that they possess the same alleles as the parent. However, some of the SSSLs derived from the C3 parental isolate differ from each other in allele frequency at bi-allelic loci [15].

*Experimental design*

175 The field experiment was established in a randomized factorial design with nine  
replicate blocks, 15 different inoculation treatments (14 different *R. irregularis* lines  
and one mock-inoculated treatment) and two cassava cultivars as factors. There was  
one replicate of each treatment combination per block and 9 replicates per treatment  
combination. To avoid cross contamination between treatments in the field,  
180 experimental units (inoculated or mock-inoculated plants) were positioned 3 metres  
apart, with two non-treated plants at one metre distances in between. Cassava was  
planted in rows, with a planting density of 10000 plants ha<sup>-1</sup>, which is the standard  
planting density recommended in the region. Plants were given fertilizer at the rate of  
233 Kg ha<sup>-1</sup> urea, 125 Kg ha<sup>-1</sup> di-ammonium phosphate (DAP), 100 Kg ha<sup>-1</sup> potassium  
185 chloride (KCl) and 41 Kg ha<sup>-1</sup> of Kieserite (a fertilizer comprising 3% soluble  
potassium, 24% magnesium and 19% sulphur) and 22 Kg ha<sup>-1</sup> of Vicor (a granular  
fertilizer comprising 15% nitrogen, 5% calcium, 3% magnesium, 2% sulphur, 0.02%  
boron, 0.02% copper, 0.02% manganese, 0.005% molybdenum, 2.5% zinc). The level  
of P is 50% of that recommended for the region. This was used because previous  
190 experiments showed that there was no significant increase in cassava root yields in the  
same soil using 100% of the recommended P application compared to 50% P  
application [5]. Half of the fertilizer was applied 45 days after planting and the rest  
was applied 90 days after planting.

Cassava stem cuttings were inoculated with 500 propagules of *R. irregularis*, at 15  
195 and again at 45 days after planting. Each plant was inoculated by one *R. irregularis*  
line. The mock-inoculated treatment received the same volume of water.

*Sampling, harvesting and measurements*

Three replicate plants of each treatment combination were tagged at the start of the  
200 experiment. Three months after inoculation, fine roots of tagged plants were sampled  
using a soil corer, washed and stored at -80°C for later molecular analysis.

Twelve months after inoculation, each inoculated or mock-inoculated plant was  
removed by hand. Bulbous roots were weighed and then dried and weighed again.  
Root weight data are publicly available in a separate manuscript [11]. Fine roots were  
205 treated in the same way as the root samples taken 3 months after inoculation, except  
that a sub-sample of roots was stained to measure colonization by AMF (as described  
in Ceballos et al. 2019). Because it is often difficult to recover fine cassava roots, we  
were not able to obtain root samples of all replicates. The numbers of replicates  
sampled is shown in Table S2.

210 *DNA extraction and sequencing*

One hundred mg of each root sample was used to extract DNA with the PowerSoil  
DNA isolation kit (MoBio Laboratories Inc., Carlsbad, CA, USA). The small  
ribosomal subunit (SSU) region was amplified from each DNA sample using the  
primer pair AML1 and AML2 [28]. The PCR was carried out in a final volume of 20  
215 ml, using 0.1 mM dNTPs, 10 pmol of each primer, 5U of Taq polymerase and the  
supplied reaction buffer (Thermo Fisher Scientific), under the following conditions:  
initial denaturation at 94°C for 3 min, 30 cycles at 94°C for 30 s, 50°C for 1 min, 72  
°C for 1 min, and a final extension period at 72°C for 10 min. The first PCR product  
was then diluted 1/100 with distilled deionized H<sub>2</sub>O. The dilutions were immediately  
220 used in a second PCR reaction performed using the NS31 and AM1 [29, 30] with the

### *Mycorrhizal fungal communities*

same PCR regime, except that the annealing temperature was 58°C. Primer NS31\* had a 5 nt extension used as a barcode to distinguish sequences from the different samples after sequencing.

Following the second PCR step, amplicons of around 550 bp were separated in an  
225 agarose gel and excised. The DNA was extracted with a gel purification kit (Wizard®  
SV Gel and PCR Clean-Up System, Promega). Amplicons were pooled and the  
concentration was standardized. Then libraries were constructed using the Illumina  
TruSeq® DNA Sample Preparation high-throughput (HT) kit. Library quality was  
assessed by capillary electrophoresis through a Fragment Analyzer™ (Advanced  
230 Analytical Technologies, Inc.). In total, 13 libraries were made with a mean number  
of pooled samples per library of 34 (range 17-45). Sequencing of the libraries was  
carried out on a 300 PE MiSeq platform. The 13 libraries were distributed in 9 lanes  
for sequencing. Some libraries were run individually in one lane and some other  
libraries were run with another library in the same lane. Pooling more than two  
235 libraries in a lane did not affect OTU number.

### *Bioinformatic analysis*

Illumina adapter sequences were removed from the reads, as well as nucleotides  
having an average Phred score below 15 within a 9bp window. Reads containing  
undetermined nucleotides (i.e. N) were discarded. All these steps were performed  
240 with TagCleaner and PrinSeq. Good quality reads were then checked for correct  
barcodes, demultiplexed and merged using PEAR software by specifying a minimum  
merged read length of 200bp. At this stage, 27520013 reads with a mean length of  
511bp were retained. Primer and barcode sequences were then removed and reads  
with a length below 500bp were discarded.

*Mycorrhizal fungal communities*

245 Remaining reads were trimmed to a 500bp length and sorted according to their  
nucleotide sequence (hereafter referred to as rRNA allele) and their relative  
abundance in the dataset. This left a total of 15883170 reads that were analyzed as the  
whole dataset comprising all treatments and both sampling times. Alleles that were  
present in only one root sample were considered uninformative for AMF community  
250 comparisons and were, therefore, removed from the dataset. This represented  
1'405'160 alleles following read trimming and singleton removal. Of these, 4'936'382  
sequences were submitted to the DBC454 software. This corresponds to the collection  
of alleles weighted by their relative occurrence in the dataset (i.e. an allele found in  
100 root samples occurred 100 times in the dataset). The alleles were submitted to a  
255 BLAST search against INSDC (<http://www.insdc.org>) and MaarjAM  
(<https://maarjam.botany.ut.ee>) databases with default parameters in order to determine  
their putative taxonomic origin. Each allele was classified as either non-AMF,  
potential AMF or valid AMF, depending on the identity of the best match in both  
databases and the percentage of similarity to it. We used a 95% similarity threshold to  
260 the INSDC database and a 97% similarity threshold to MaarjAM database, to  
distinguish valid AMF from potential AMF. We also assigned a putative AMF family  
and virtual taxa (VT) to each allele considered as either potential AMF or valid AMF  
by using the identity of the best match given in the MaarjAM database.

*OTU model selection*

265 OTUs were assigned by a hierarchical clustering model using DBC454 v1.4.5 [31].  
Because this procedure differs from the commonly used VT classification system, the  
selected models were compared to a VT classification using the Adjusted Rand Index  
[32]. Because model selection is essential for optimizing the numbers of OTUs that

are reliably detected, we provide full details of the pipeline used for model selection  
270 as a Supplementary note 1.

### *Phylogeny*

Phylogenetic relationships between valid AMF OTUs from the selected DBC454  
model were inferred by building a phylogenetic tree, using consensus sequences based  
on nucleotide frequency for each OTU, as well as SSU rRNA type sequences from  
275 known AMF species determined by [33]. Sequences were aligned using MAFFT  
7.058. The phylogenetic tree was inferred using MrBayes 3.2.2 [34] with a GTR+G  
nucleotide substitution model and *Schizosaccharomyces pombe* SSU rRNA sequence  
as the tree root. Two independent runs of MCMC sampling for 2 million generations  
were performed with a sampling of chain state at each 1000 generations. A maximum  
280 clade credibility tree was compiled after checking for run convergence and discarding  
30 percent of trees as a burn-in fraction.

### *Patterns of OTU community diversity (alpha diversity)*

The Shannon-Weiner Index was used to determine OTU taxonomic alpha diversity in  
each sample. Phylogenetic alpha diversity was assessed by calculating the net-  
285 relatedness index (NRI). Replicates were then pooled by AMF treatment and cassava  
cultivar treatments. We used the “mock-inoculated” treatment to determine the null  
community mean and standard deviation of diversity indices for each cassava variety  
independently. Significant differences between null community diversity and *R.*  
*irregularis* treatments for each cassava variety were assessed using ANOVA and a  
290 Tukey honest significant difference (HSD) post-hoc test. We also assessed the  
relationship between OTU diversity in each sample and cassava root dry-weight as

### *Mycorrhizal fungal communities*

well as AMF root colonization level using the Pearson's product moment correlation coefficient.

#### *Patterns of OTU community turnover (beta-diversity)*

295 In order to investigate whether OTU taxonomic turnover and phylogenetic turnover was affected by *R. irregularis* line and cassava cultivar treatments, we built pairwise dissimilarity distance matrices between each AMF treatment of a given cassava variety by using the Bray-Curtis distance and mean nearest taxon distance (MNTD), respectively. Significant effects of *R. irregularis* lines on both metrics of community  
300 turnover were assessed using PERMANOVA analysis. We also ran hierarchical clustering methods using *pvclust* in R 3.4.2 (<http://www.R-project.org>) [35]. The “average” method was implemented in *pvclust* and we assessed cluster robustness with a bootstrap resampling strategy.

#### *OTU spatial autocorrelation*

305 Even though the experimental design should limit the bias of OTU distribution due to dispersal limitation, we investigated whether spatial distance between samples in the field site could explain the observed OTU distribution patterns. Therefore, we performed Mantel tests between community diversity indices, as well as inferred distance matrices of community turnover, and spatial distances matrices to test  
310 whether alpha or beta diversity correlated with spatial distances among plants.

#### *Effect of sampling time on alpha diversity and community turnover*

Differences in alpha taxonomic and phylogenetic diversity among the same plants that were sampled at 3, and again at 12 months post-inoculation were tested using paired *t*-

*Mycorrhizal fungal communities*

tests. Differences in community taxonomic and phylogenetic turnover between the  
315 two sampling times were assessed by performing PERMANOVA analyses on the  
Bray-Curtis and MNTD, with sampling time as a factor. Hierarchical clustering was  
also performed on the data at the two time periods.



## Results

320 The pipeline, and results of the clustering model, the parameters determined to give optimal OTU selection and the characteristics of the dataset used for the subsequent analyses are all presented in Supplementary note 1. The placement of the OTUs inside the phylogenetic tree built with SSU reference sequences was coherent with their taxonomic classification using best match annotation of BLAST results (Figure S1).

325 The vast majority of OTUs fell into the Glomeraceae clade (44 OTUs; 96.95% of reads), and mostly within the *Rhizophagus* genus. The second most abundant group was in the Acaulosporaceae family (6 OTUs, 2.9% of reads), followed by Claroideoglomeraceae (2 OTUs, 0.084% of reads) and Gigasporaceae/Scutellosporaceae (2 OTUs, 0.051% of reads).

### 330 *Colonization by AMF*

Inoculation with SSSL progeny of isolate C3 significantly affected the levels of colonization by AMF inside the cassava roots but the way the SSSLs affected AMF colonization was not the same in the two cassava cultivars (Figure S2). Colonization by AMF did not differ significantly among plants inoculated with C2 and its SSSL progeny in either cultivar (Figure S2). Colonization by AMF differed significantly among cassava roots that were inoculated with the parental isolate C3 and its progeny SSSLs. However, the differences among treatments were not the same in the two cassava cultivars. Colonization was lowest in plants inoculated with parental isolate C3 and highest in plants inoculated with the SSSL C3.6 in cultivar CM4574. In 335  
340 cultivar MCOL2737, AMF colonization was highest in plants inoculated with SSSL C3.3 and lowest in plants inoculated with SSSL C3.7.

*Alpha diversity - Shannon-Weiner Index*

Twelve months following inoculation, AMF taxonomic alpha diversity (as measured  
345 by the Shannon-Weiner index) was significantly affected by the AMF inoculation  
treatments and by cultivar but with no significant interaction between these two  
factors (Table S3). A further ANOVA performed separately on the data of each  
cultivar showed that alpha diversity was only affected by the *R. irregularis* treatments  
in cultivar MCOL2737 (Table S4). In this cultivar, alpha diversity was significantly  
350 the highest in roots of cassava inoculated with *R. irregularis* SSSL C3.6. Alpha  
diversity in these plants differed significantly from alpha diversity in the mock-  
inoculated, C3.1 and C3.9 treatments (Figure 1). Lines C3.6 (highest value) and C3.9  
(lowest value) were SSSLs derived clonally from the same parental isolate.

There was no significant correlation between the Shannon-Weiner index, root  
355 colonization and dry cassava weight. The Shannon-Weiner index was related to the  
number of reads and the number of OTUs in each root sample (Table S5). No  
correlation between differences in diversity and spatial distance was observed (Table  
S5).

*Alpha diversity - phylogenetic diversity (NRI)*

360 *R. irregularis* line treatments strongly affected the NRI of AMF communities in  
cassava roots, while there was no significant effect of cassava cultivar (Table S3). A  
marginally significant interaction between the two factors was observed (Table S3).  
Similarly to the Shannon-Weiner index, a further ANOVA performed separately on  
the datasets for each cassava cultivar showed that significant differences in NRI were  
365 only observed in the roots of cultivar MCOL2737 (Table S4). The mean pairwise  
distance (MPD) is calculated on a presence-absence matrix with a larger value

*Mycorrhizal fungal communities*

representing closer phylogenetic distance and smaller values indicating greater phylogenetic distance among the members of the AMF community. The phylogenetic distance among the AMF community in the mock-inoculated treatment was the  
370 highest suggesting a close phylogenetic similarity among the AMF taxa in the pre-existing AMF community (Figure 2). In contrast, AMF communities in cultivar MCOL2737 inoculated with parental isolate C2 and its SSSLs and parental isolate C3 showed a significantly smaller MPD value indicating inoculation with those treatments resulted in more phylogenetically diverse AMF communities in the roots  
375 (Figure 2).

We also found a negative relationship between the Shannon Weiner index and NRI, which meant that as AMF communities became more taxonomically diverse they also became more phylogenetically diverse (Figure S3).

*Beta diversity- taxonomic and phylogenetic turnover*

380 Bray-Curtis dissimilarity indices of the AMF communities differed significantly among *R. irregularis* line treatments in both cultivars although the way this measurement was affected by the different AMF treatments differed significantly between the two cassava cultivars. (Tables S6 and S7). We performed a hierarchical analysis based on Bray-Curtis dissimilarity matrices that was conducted on data from  
385 each cassava cultivar separately. A significant cluster represents a group of two or more cassava plants whose roots contained taxonomically similar AMF communities. The clustering showed that the taxonomic composition of the AMF communities in both cultivars was clustered significantly at 12 months after inoculation with different fungal lines but that different patterns of clustering were observed in the two cultivars

390 (Figures 3a and 3b) meaning that the cassava cultivar also determined the taxonomic composition of the AMF communities.

Phylogenetic turnover, or beta phylogenetic diversity, was assessed by calculating the mean-nearest taxon distance (MNTD). Significant differences in the MNTD of AMF communities among AMF line treatments occurred as well as between the two  
395 cultivars (Table S6). Because there was also a significant AMF treatment x cassava cultivar interaction we also analysed the effects of AMF inoculation treatments on each cassava cultivar separately, showing that there was a significant effect in cultivar MCOL2737 but not in cultivar CM4574 (Table S6 and Table S7). Hierarchical clustering based on MNTD also showed more discrete clusters of phylogenetically  
400 similar AMF communities occurred in cassava variety MCOL2737 (Fig. S4a) compared to cultivar CM4574 (Fig. S4b).

#### *Differences in alpha and beta diversity at 3 and 12 months following inoculation*

In order to investigate possible changes in AMF community diversity in roots between 3 and 12 months, we analysed paired data from individual tagged plants,  
405 sampled at 3 and again at 12 months following inoculation. A paired *t*-test was then used to compare values at 3 and 12 months from the same plants. Results showed that AMF community alpha diversity, measured as the Shannon-Weiner index, was higher at 12 months than at 3 months (Figure 4a, Table S8), even though there was no increase in read number or OTU number during this time period in those plants (Table  
410 S8; Figures S5 and S6). Mean phylogenetic diversity indices were also influenced by the number of months following inoculation with a strong decrease in phylogenetic relatedness in the AMF communities between 3 and 12 months following inoculation (Table S8; Figure 4b).

*Mycorrhizal fungal communities*

AMF beta diversity at both the taxonomic and phylogenetic level, as measured by the  
415 Bray-Curtis Distance and MNTD, showed that the similarity in the AMF community  
composition (as shown by hierarchical clusters of the data) changed between 3 and 12  
months following inoculation in MCOL2737 (Figures 5 and 6; Table S9). Taxonomic  
composition of the AMF communities was more similar among plants at 3 months, as  
shown by larger clusters of similarity compared to 12 months following inoculation  
420 (Figure 5), indicating a change in AMF taxonomic community composition over time.  
Phylogenetic beta diversity in MCOL2737 roots also showed that clusters of plants  
showing communities with similar composition of species with a given phylogenetic  
relatedness occurred at both 3 and 12 months following inoculation. However, the  
clusters were not comprised of the same treatments at 3 and 12 months showing that  
425 differences phylogenetic composition of the community changed over time.

## Discussion

While there are many descriptive studies looking at AMF diversity and community structure in different vegetation types, soil types and environmental gradients, there  
430 are surprisingly few studies looking at AMF inoculation effects on the local AMF community in the field and in an experimental framework. Our study is unique in that we experimentally studied the effect of genetically different parental isolates of the same AMF species, *R. irregularis*, and clonal SSSLs produced by each of the parental fungi on existing AMF communities. We tested the effects of these inoculation  
435 treatments on the AMF communities in two cassava cultivars that differed strongly in their growth responses to inoculation and in which inoculation also affected overall AMF colonization. The SSSLs are clonal offspring of the parents and yet surprisingly strong differential effects on the local AMF community were observed.

### *AMF inoculation and its effect on local AMF community diversity*

440 We found that adding clonal progeny of the same species of AMF, *R. irregularis*, had surprisingly large and significant effects on both alpha and beta diversity of AMF communities at both the taxonomic and phylogenetic levels but that this was also highly dependent on the variety of the plant. The results are in strong contrast to most of the published studies of effects of *R. irregularis* on the local AMF community. The  
445 effects appeared largely independent of the strongly differential effects of inoculation on cassava root growth (observed by Ceballos et al. 2019) [11] or overall levels of AMF colonization by the AMF community. Inoculating cassava with a parental *R. irregularis* isolate and with its clonal single spore offspring did not significantly reduce the diversity of the AMF community or suppress colonization by other AMF  
450 species. In fact, in some cases the AMF taxonomic alpha diversity increased in the

*Mycorrhizal fungal communities*

roots of cassava in response to inoculation compared to the mock inoculated treatment and inoculation with some other siblings of the same parental fungus. Furthermore, inoculation with some of the fungi resulted in AMF communities that were phylogenetically more diverse compared to the mock inoculated treatment. The  
455 effects of inoculation with the different fungal treatments not only occurred on levels of alpha diversity but the AMF community composition (beta diversity) was also affected by inoculation with parental and SSSL progeny. All effects on alpha and beta diversity were strongly cassava cultivar dependent.

*Surprising ecological effects of clonal SSSLs on AMF communities*

460 As stated in the hypotheses, we expected to see effects of inoculation on the AMF community because we had observed that inoculation with SSSL progeny of an AMF parent strongly influenced cassava roots growth and because the clonal SSSLs also altered overall AMF colonization. However, we consider a number of effects of inoculation with these fungi to be very surprising that we discuss below.

465 Firstly, a diverse AMF and microbial community normally exists in soils. We added an extremely small amount of fungal material (approximately 1000 spores) to cassava stakes at planting and in a soil with an existing diverse microbiome. The majority of the effects were measured 12 months following inoculation. This means that despite adding only a very small amount of a fungal material, this had profound and long-  
470 lasting influence on levels of taxonomic and phylogenetic diversity as well as the composition of the AMF community.

Secondly, the fungal inocula were clonal progeny of two different parental genotypes of the same fungal species, *R. irregularis*. Isolate C3 is a dikaryon. Progeny of this

*Mycorrhizal fungal communities*

isolate, produced clonally *in vitro*, share identical alleles. However, allele frequencies  
475 at bi-allelic sites differ in their proportion among progeny, representing differences in  
the frequency of the two nucleus genotypes [15]. This means that each sibling  
contains the same genetic information but at some loci, the proportions of two alleles  
can differ. We find it surprising that such small quantitative genetic differences  
among siblings of the same parent can induce such large differences in their effects on  
480 the local AMF community. These siblings also strongly differentially affected how  
much the AMF community colonized the roots. Parental isolate C2 is a homokaryon.  
This means that all offspring are genetically identical. We did not see differential  
effects among C2 and its siblings on alpha diversity. While the C2 family did not have  
significant effects on taxonomic alpha diversity, all these isolates influenced the AMF  
485 community in the same way by increasing the phylogenetic diversity among members  
of the AMF community compared to the control.

Taken together, these results mean that adding a very small amount of very highly  
related fungal material, with what would be considered as representing miniscule  
genetic differences, to a pre-existing diverse AMF community can have long lasting  
490 effects on the AMF community at least one year later. Most significantly, this means  
that AMF communities in tropical agricultural soils appear to be extremely sensitive  
to perturbations, even to tiny differences in the inoculum.

*Are inoculation effects on the AMF community linked to plant growth or  
colonization?*

495 We saw significant effects of inoculation with *R. irregularis* SSSLs on the diversity  
and structure of AMF community. In this sense, the results partially support the  
hypotheses. However, we hypothesized that an alteration in AMF communities would



### *Mycorrhizal fungal communities*

occur where we observed effects of inoculation on plant growth and AMF colonization. Changes in cassava root growth and overall levels of AMF colonization  
500 of the roots would be a good indication of an alteration in availability of resources for AMF. In a diverse AMF community, we would expect that different AMF taxa would respond differently to an alteration in resource availability, thus driving a change in the AMF community. While, we observed changes in the AMF community, these were not obviously related to overall changes in root growth or overall levels of AMF  
505 colonization.

### *Plant genotype specific effects on AMF communities*

One notable result of this study is that in most cases, the differential effects on the AMF community, and on AMF colonization, induced by SSSLs of *R. irregularis* were strongly cassava cultivar dependent. Differential effects of the *R. irregularis* SSSLs  
510 on cassava growth in Colombia, Kenya and Tanzania were also strongly cultivar dependent [11]. What these results mean is that inoculation of crops with AMF can be altered significantly using inoculum with very small genetic differences but that the effect of inoculation on the local AMF community will likely be different according to which cassava variety the farmer chooses. Given the strong cultivar effects, a  
515 detailed investigation into the relationship between cassava genetic variability and its influence on AMF communities is highly warranted. At present, in crop production, the choice of cultivar is primarily considered before the choice of whether to inoculate with AMF. In the case of cassava cultivation, cultivar choice also determines the effects of inoculation and the subsequent consequences on the local AMF community.

520

### *Time effects*

The comparison of the AMF community between 3 and 12 months following inoculation clearly indicated that taxonomic alpha diversity greatly increased over this period while the community became composed of more distantly related taxa. Thus, 525 the AMF community that colonizes cassava roots is dynamic. We specifically focused our main harvesting effort at 12 months because previous studies showed that AMF inoculation effects on cassava are usually seen in the last month of the cassava growth period [2, 5] when the roots are rapidly accumulating starch, but we cannot rule out that earlier effects on the AMF community that were not measured in this study may 530 have been correlated with inoculation effects on cassava root weight at the final harvest.

### *Conclusions*

The central question of this study addresses an important ecological issue regarding how sensitive local AMF communities are to perturbation by very closely related 535 AMF within the same species. This study indicates that even addition of very small amounts of highly related AMF can perturb the local AMF community in tropical soils and in a way that is also highly plant genotype specific. While other studies have tested one AMF isolate on the local AMF community, with contrasting results, we show that even very small genetic changes in the inoculum can give completely 540 contrasting effects ranging from no effect on the local AMF community to a large change in AMF alpha and beta diversity in the local community. Our study provides a framework for specifically testing a series of new and pertinent ecological questions, namely: 1. Why does an AMF community respond differently to additional of highly related fungi? 2. Are alterations to the AMF community that are caused by inoculation

545 with an AMF detrimental or beneficial? 3. In the case where inoculation causes  
changes in plant growth but does not cause changes in the AMF community, are  
inoculation effects direct or mediated through other components of the soil  
microbiota? While researchers have put a lot of effort into describing AMF  
communities using DNA sequencing approaches, at present, there is a great lack of  
550 experimental studies looking at which factors can alter AMF diversity and community  
structure. We strongly encourage community ecologists interested in AMF  
community diversity to focus on more experimental studies that can help to unravel  
these important ecological questions about the use of AMF inoculants.

## 555 **Acknowledgments**

We thank the La Salle University for allowing us to conduct the field trial at the  
Utopia campus, the Utopia students for helping establish and maintain the experiment  
and Ricardo Peña Venegas and Cristhian Fernandez for logistical support. We thank  
the International Center for Tropical Agriculture (CIAT) for providing cultivars  
560 CM4574 and University La Salle for providing cultivar MCOL2737. All  
bioinformatics computations were performed at the Vital-IT ([www.vital-it.ch](http://www.vital-it.ch)) Center  
for High Performance Computing of the Swiss Institute of Bioinformatics and all  
Illumina MiSeq® sequencing was performed at the Genomic Technologies Facility  
(GTF) of the University of Lausanne. This work was supported by two Swiss National  
565 Science Foundation grants to IRS (grant numbers: IZ70Z0-131311/1 and  
31003A\_162549) and a COLCIENCIAS scholarship to YMO and IC. Sequence reads  
were deposited in the NCBI SRA database (BioProject Accession Number:  
SRP133761).

**Conflict of interest:** The authors declare no conflict of interest

570

### **Supplementary Material**

Supplementary information is available with this manuscript, including 6 supplementary figures and Supplementary note 1.

575 **Figure legends**

**Figure 1:** Shannon-Weiner index of OTU diversity inside the roots of cassava varieties CM4574 and MCOL2737 twelve months following inoculation with the AMF line treatments. Bars in purple represent treatments with parental isolate C2 and its corresponding SSL offspring. Bars in orange represent treatments with parental isolate C3 and its corresponding SSL offspring. Mock corresponds to the mock-inoculated treatment. Any bars with the same letter above means that they are not significantly different according to a Tukey HSD post-hoc test ( $P < 0.001$ ).

**Figure 2:** Net relatedness index (NRI) of OTUs inside roots of cassava varieties CM4574 and MCOL2737 twelve months following inoculation with the AMF line treatments. Bars in purple represent treatments with parental isolate C2 and its corresponding SSL offspring. Bars in orange represent treatments with parental isolate C3 and its corresponding SSL offspring. Mock corresponds to the mock-inoculated treatment. Any bars with the same letter above means that they are not significantly different according to a Tukey HSD post-hoc test ( $P < 0.001$ ).

590 **Figure 3:** Hierarchical clustering based on Bray-Curtis Dissimilarity in **(a)** cassava variety MCOL2737 **(b)** cassava variety CM4574. Red squares indicate >95% probability of the existence of a cluster using the approximated-unbiased value. Bars in purple represent treatments with parental isolate C2 and its corresponding SSL offspring. Bars in orange represent treatments with parental isolate C3 and its corresponding SSL offspring. Mock corresponds to the mock-inoculated treatment.

595 **Figure 4:** **(a)** Bar-Plot showing Shannon Weiner index measured in the same individual plants sampled at 3 and 12 months following inoculation. See Table S8 for results of paired t-test. **(b)** Bar-Plot showing NRI measured in the same individual

plants sampled at 3 and 12 months following inoculation. See Table S8 for results of  
600 paired t-test.

**Figure 5:** Hierarchical clustering based on Bray-Curtis Dissimilarity index for paired cassava plants of cultivar MCOL2737 sampled at 3 months (in blue) and 12 months (in green) following inoculation. Red squares indicate a >95% probability of the existence of a cluster using the approximate-unbiased value. Mock corresponds to the  
605 mock-inoculated treatment.

**Figure 6:** Hierarchical clustering based on Mean Nearest Taxon Distance (MNTD) for paired cassava plants of cultivar MCOL2737 sampled at 3 months (in blue) and 12 months (in green) following inoculation. Red squares indicate a >95% probability of the existence of a cluster using the approximate-unbiased value. Mock corresponds to  
610 the mock-inoculated treatment.

Figure 1

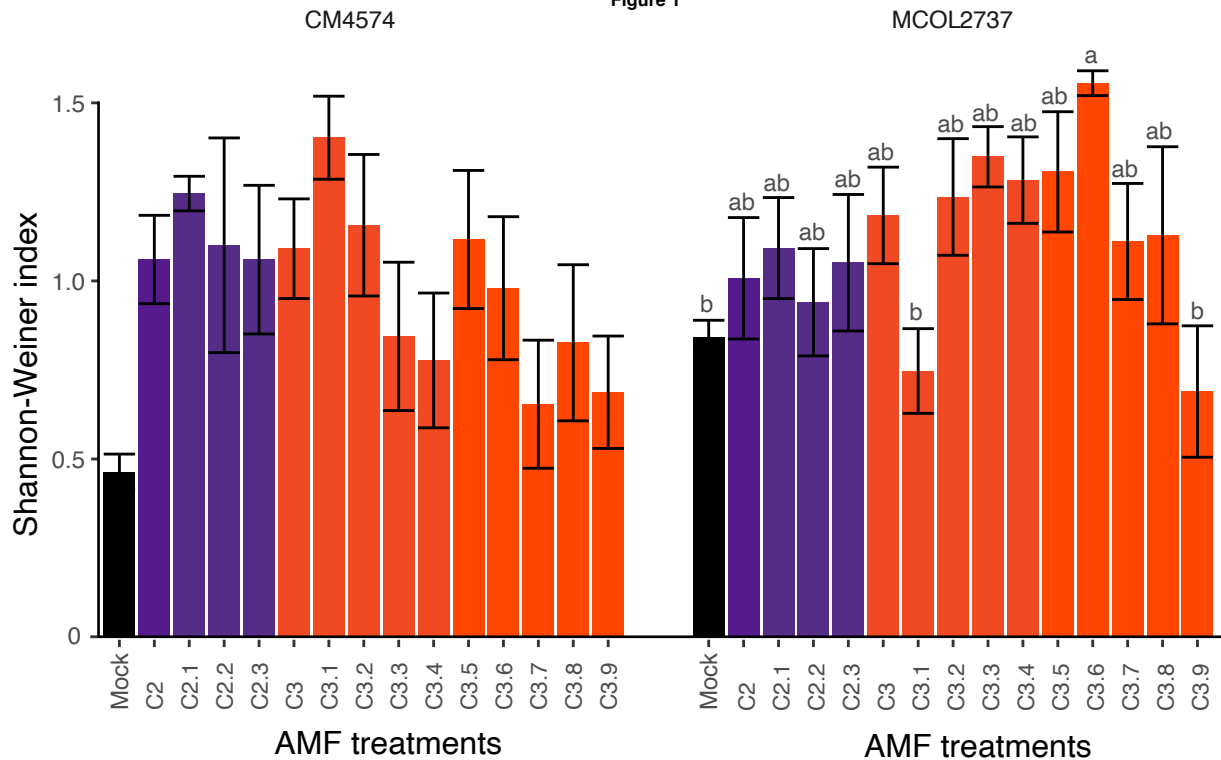

CM4574

Figure 2

MCOL2737

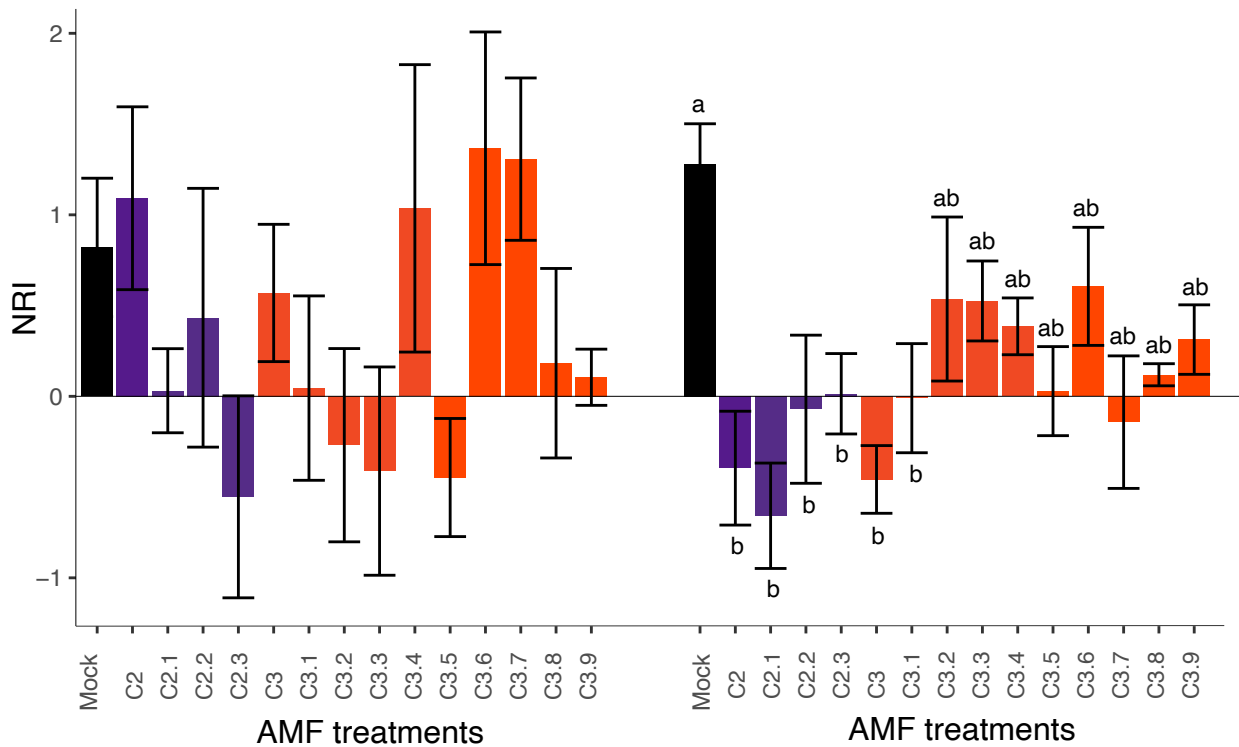



### MCOL2737

(a)

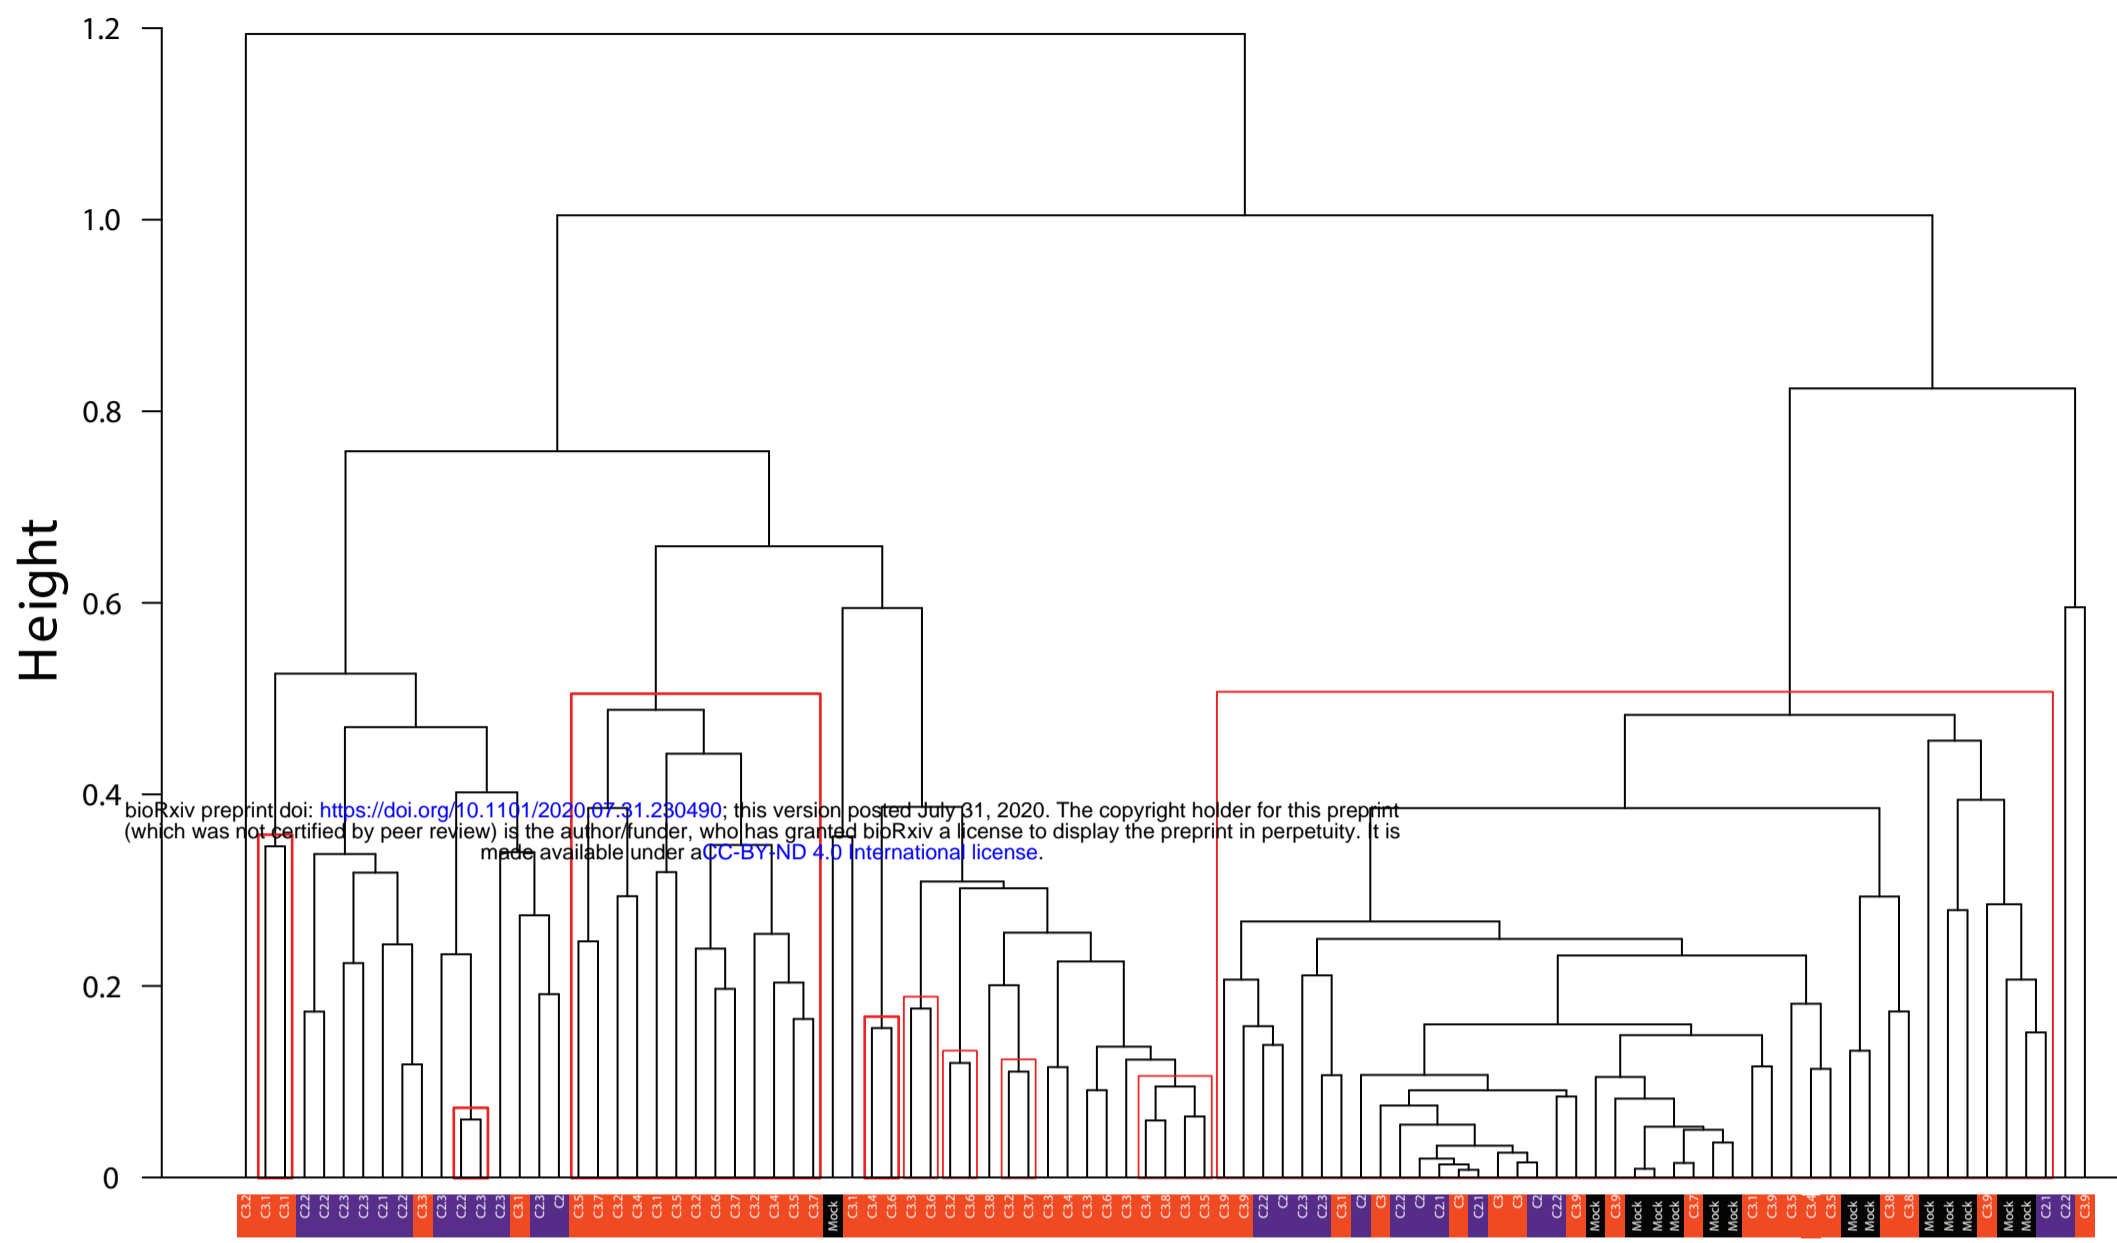

bioRxiv preprint doi: <https://doi.org/10.1101/2020.07.31.230490>; this version posted July 31, 2020. The copyright holder for this preprint (which was not certified by peer review) is the author/funder, who has granted bioRxiv a license to display the preprint in perpetuity. It is made available under aCC-BY-ND 4.0 International license.

AMF treatments

### CM4574

(b)

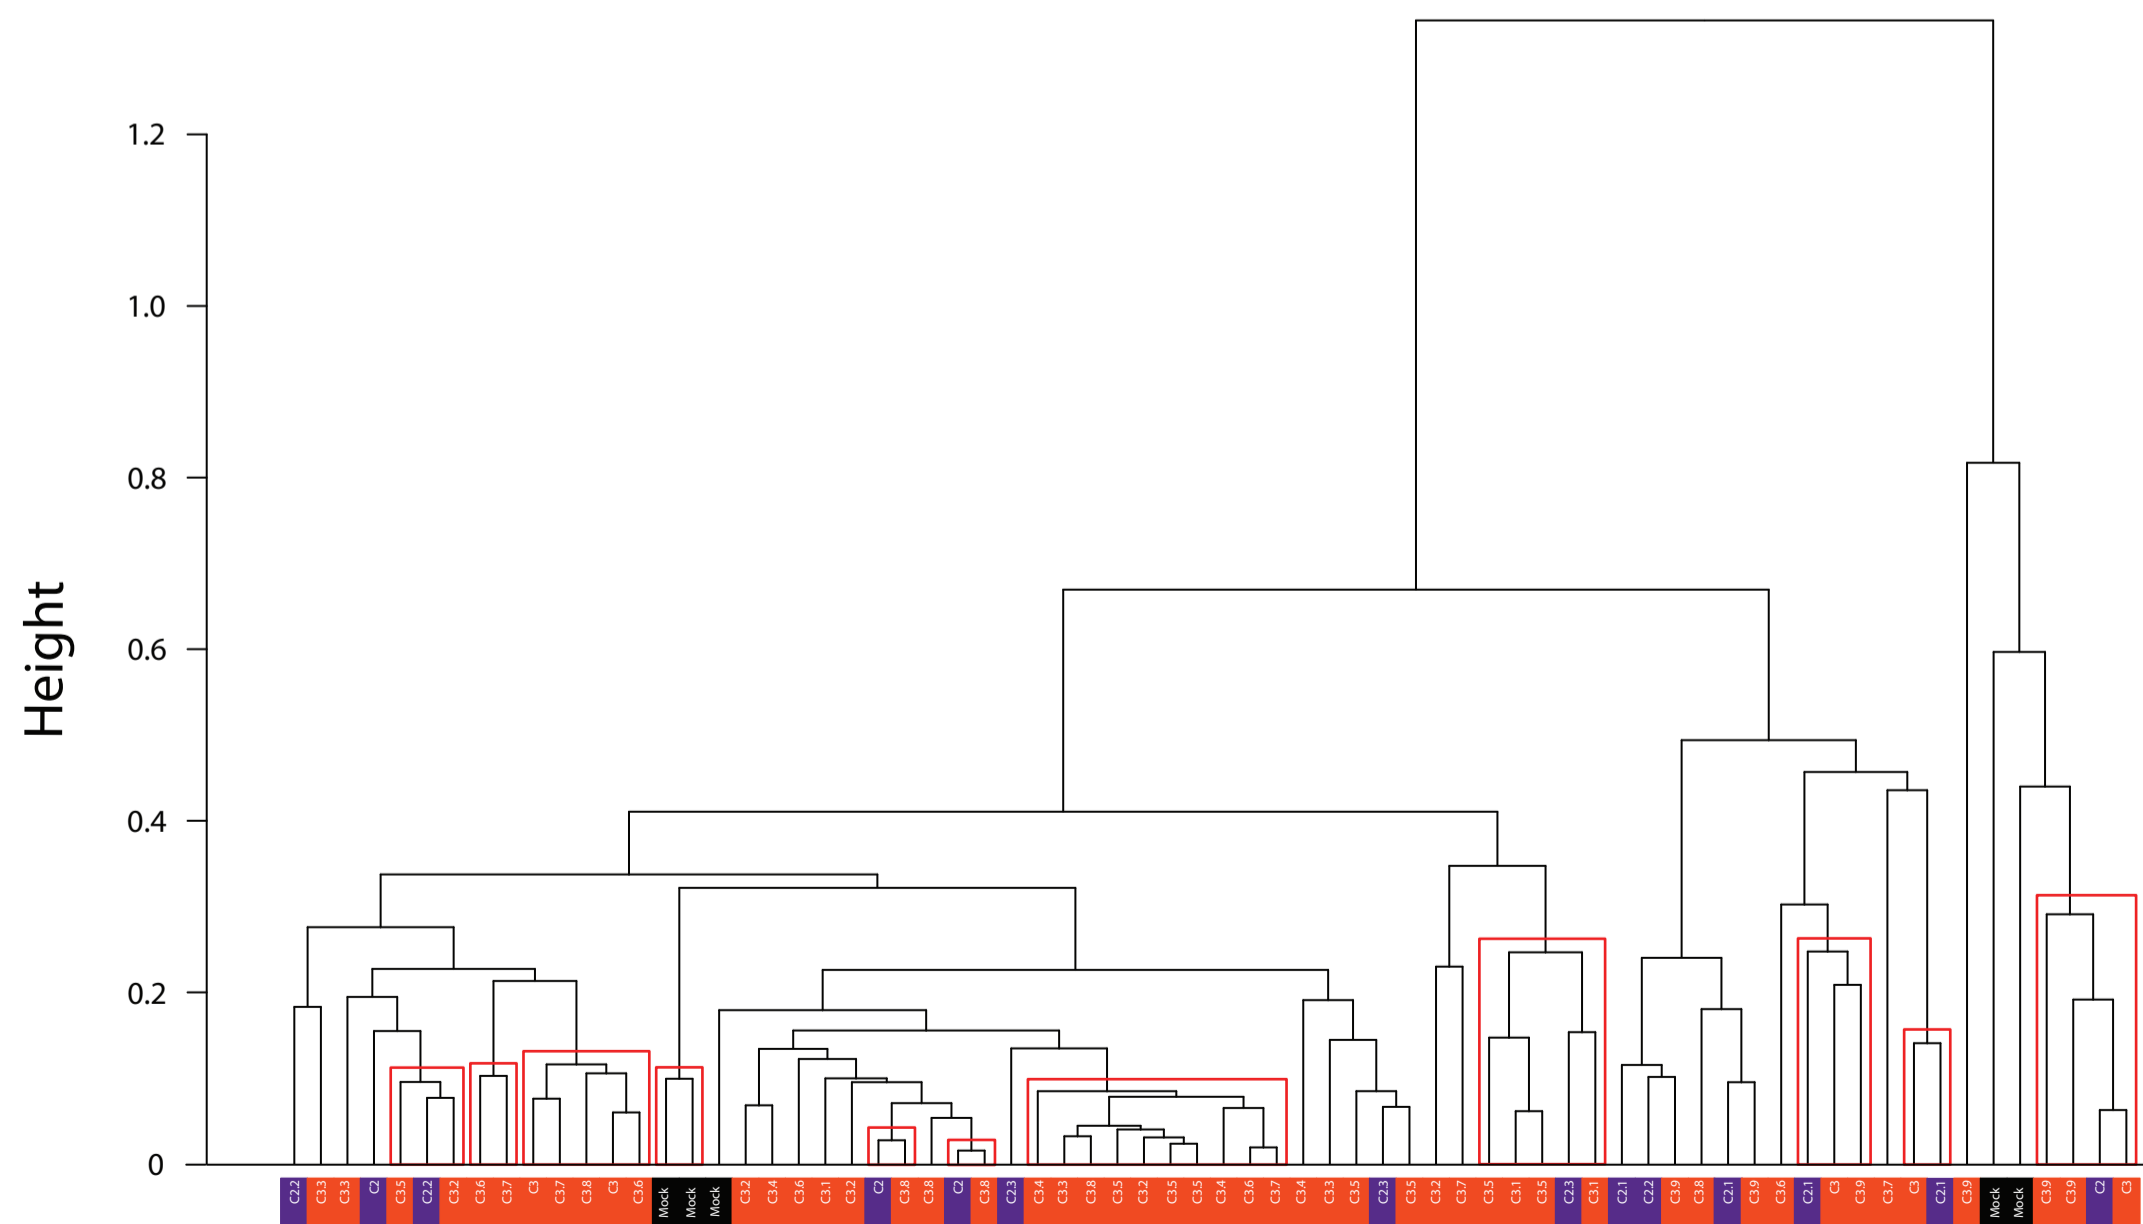

AMF t treatments

**(a)**

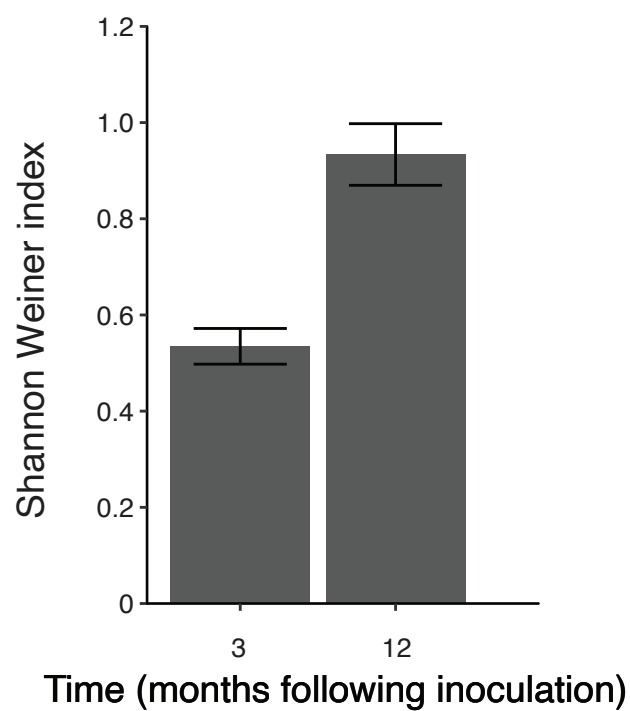

**(b)**

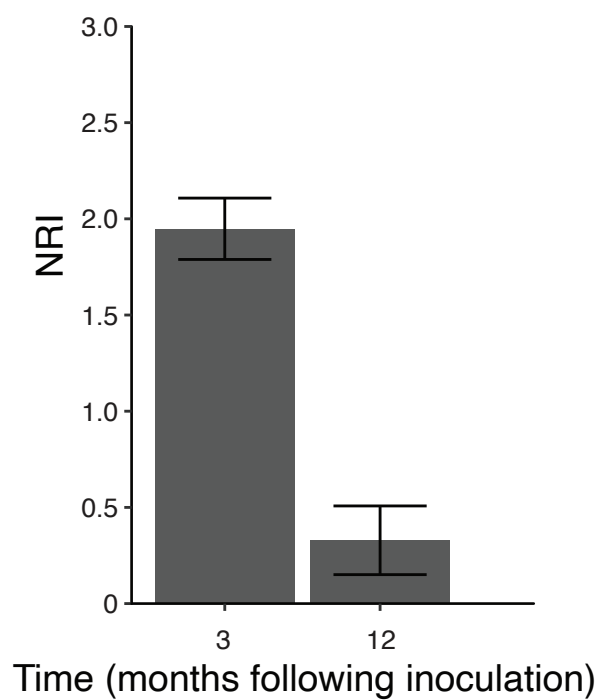

Figure 5

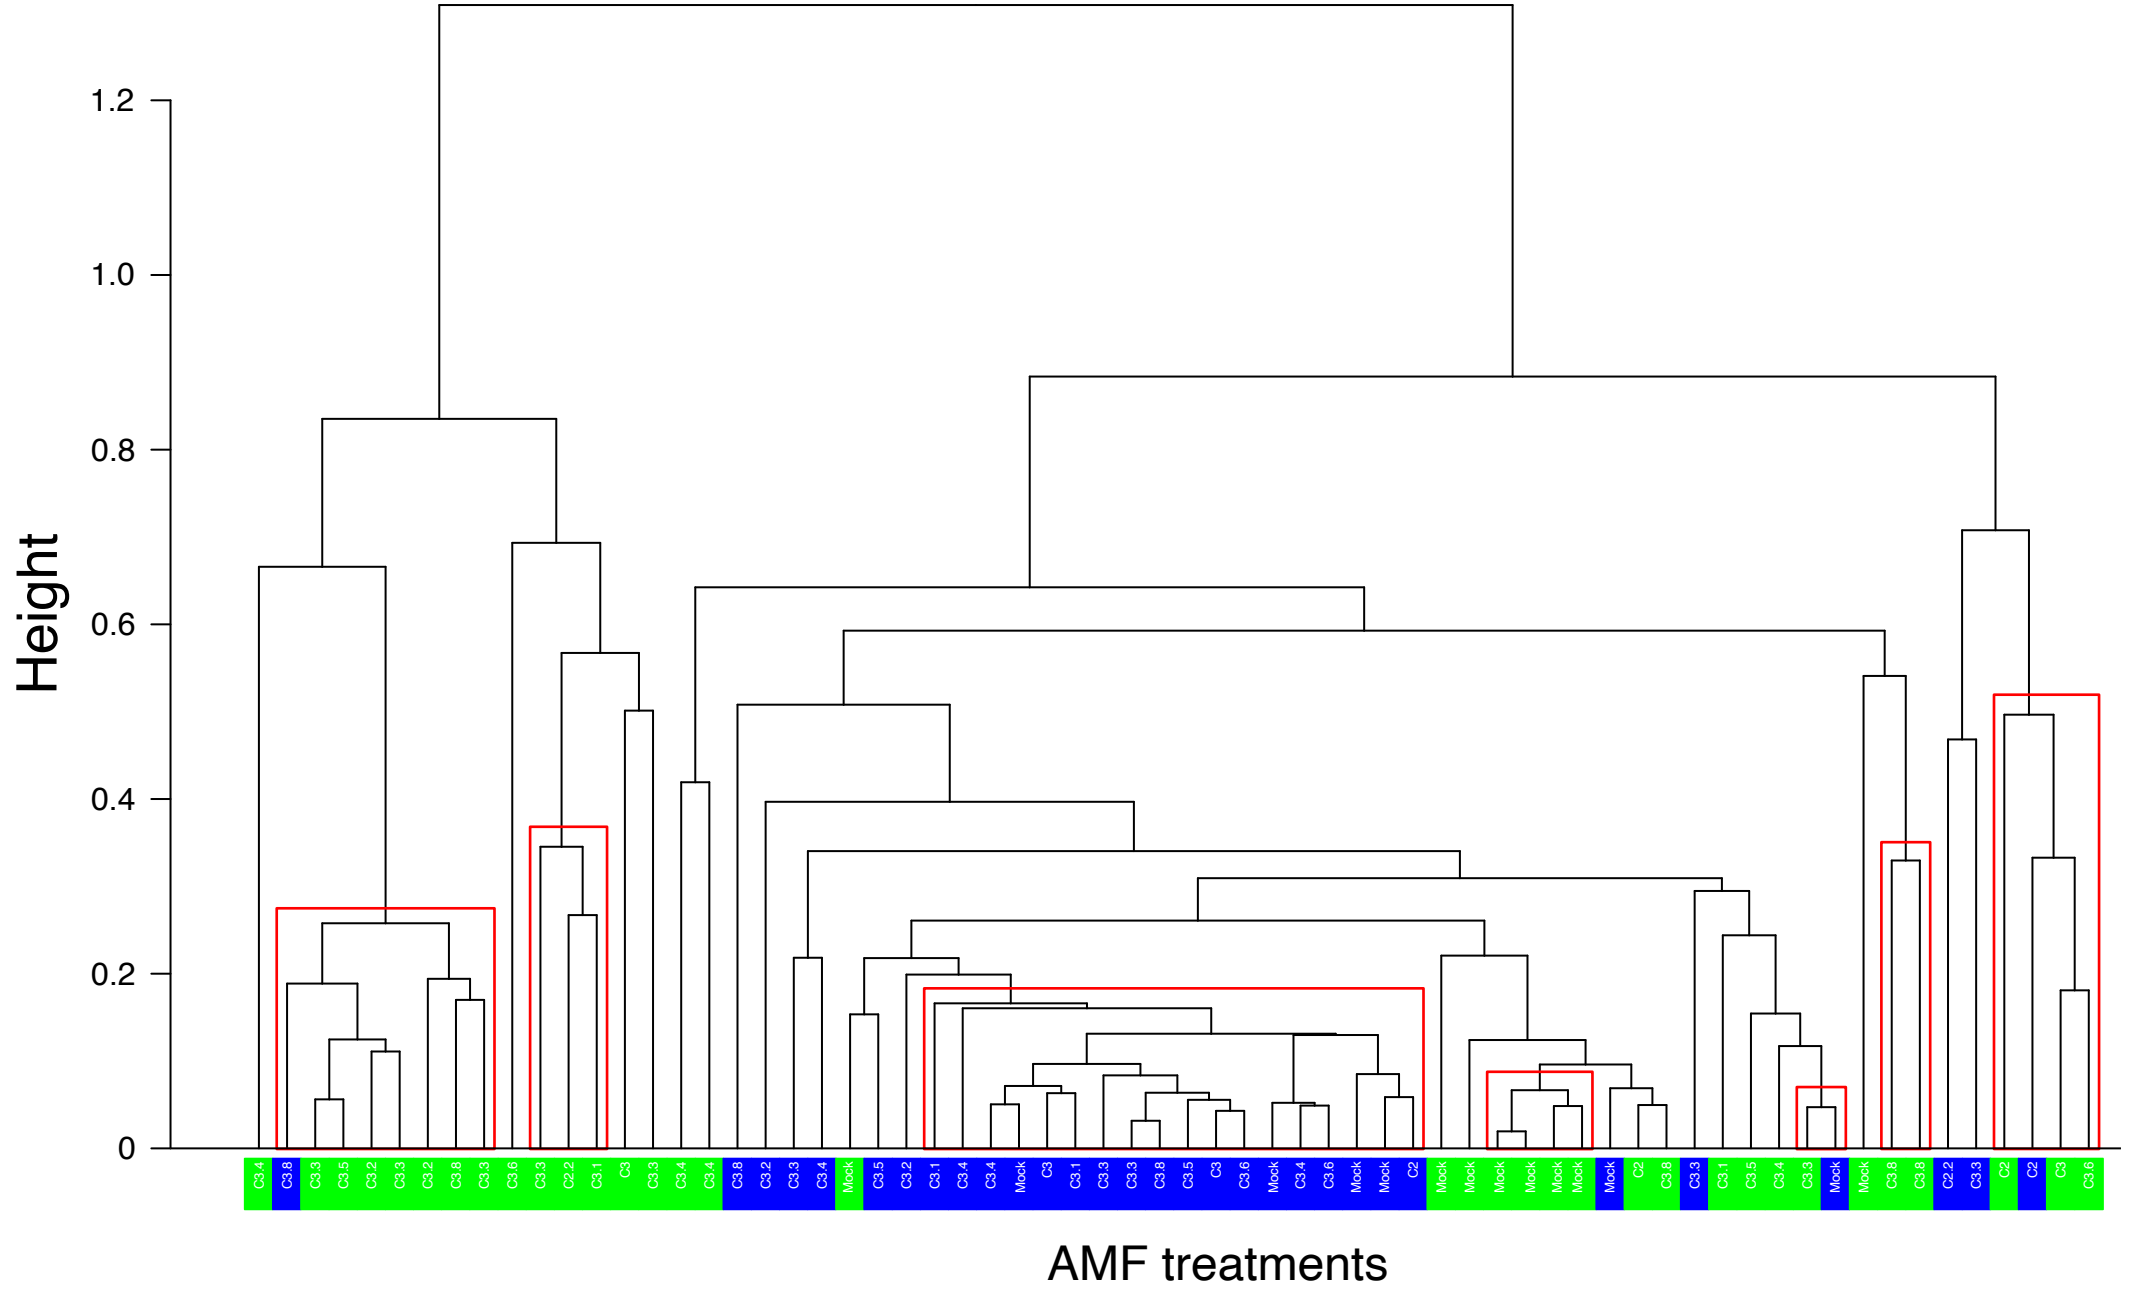

Figure 6

# Sampling Time

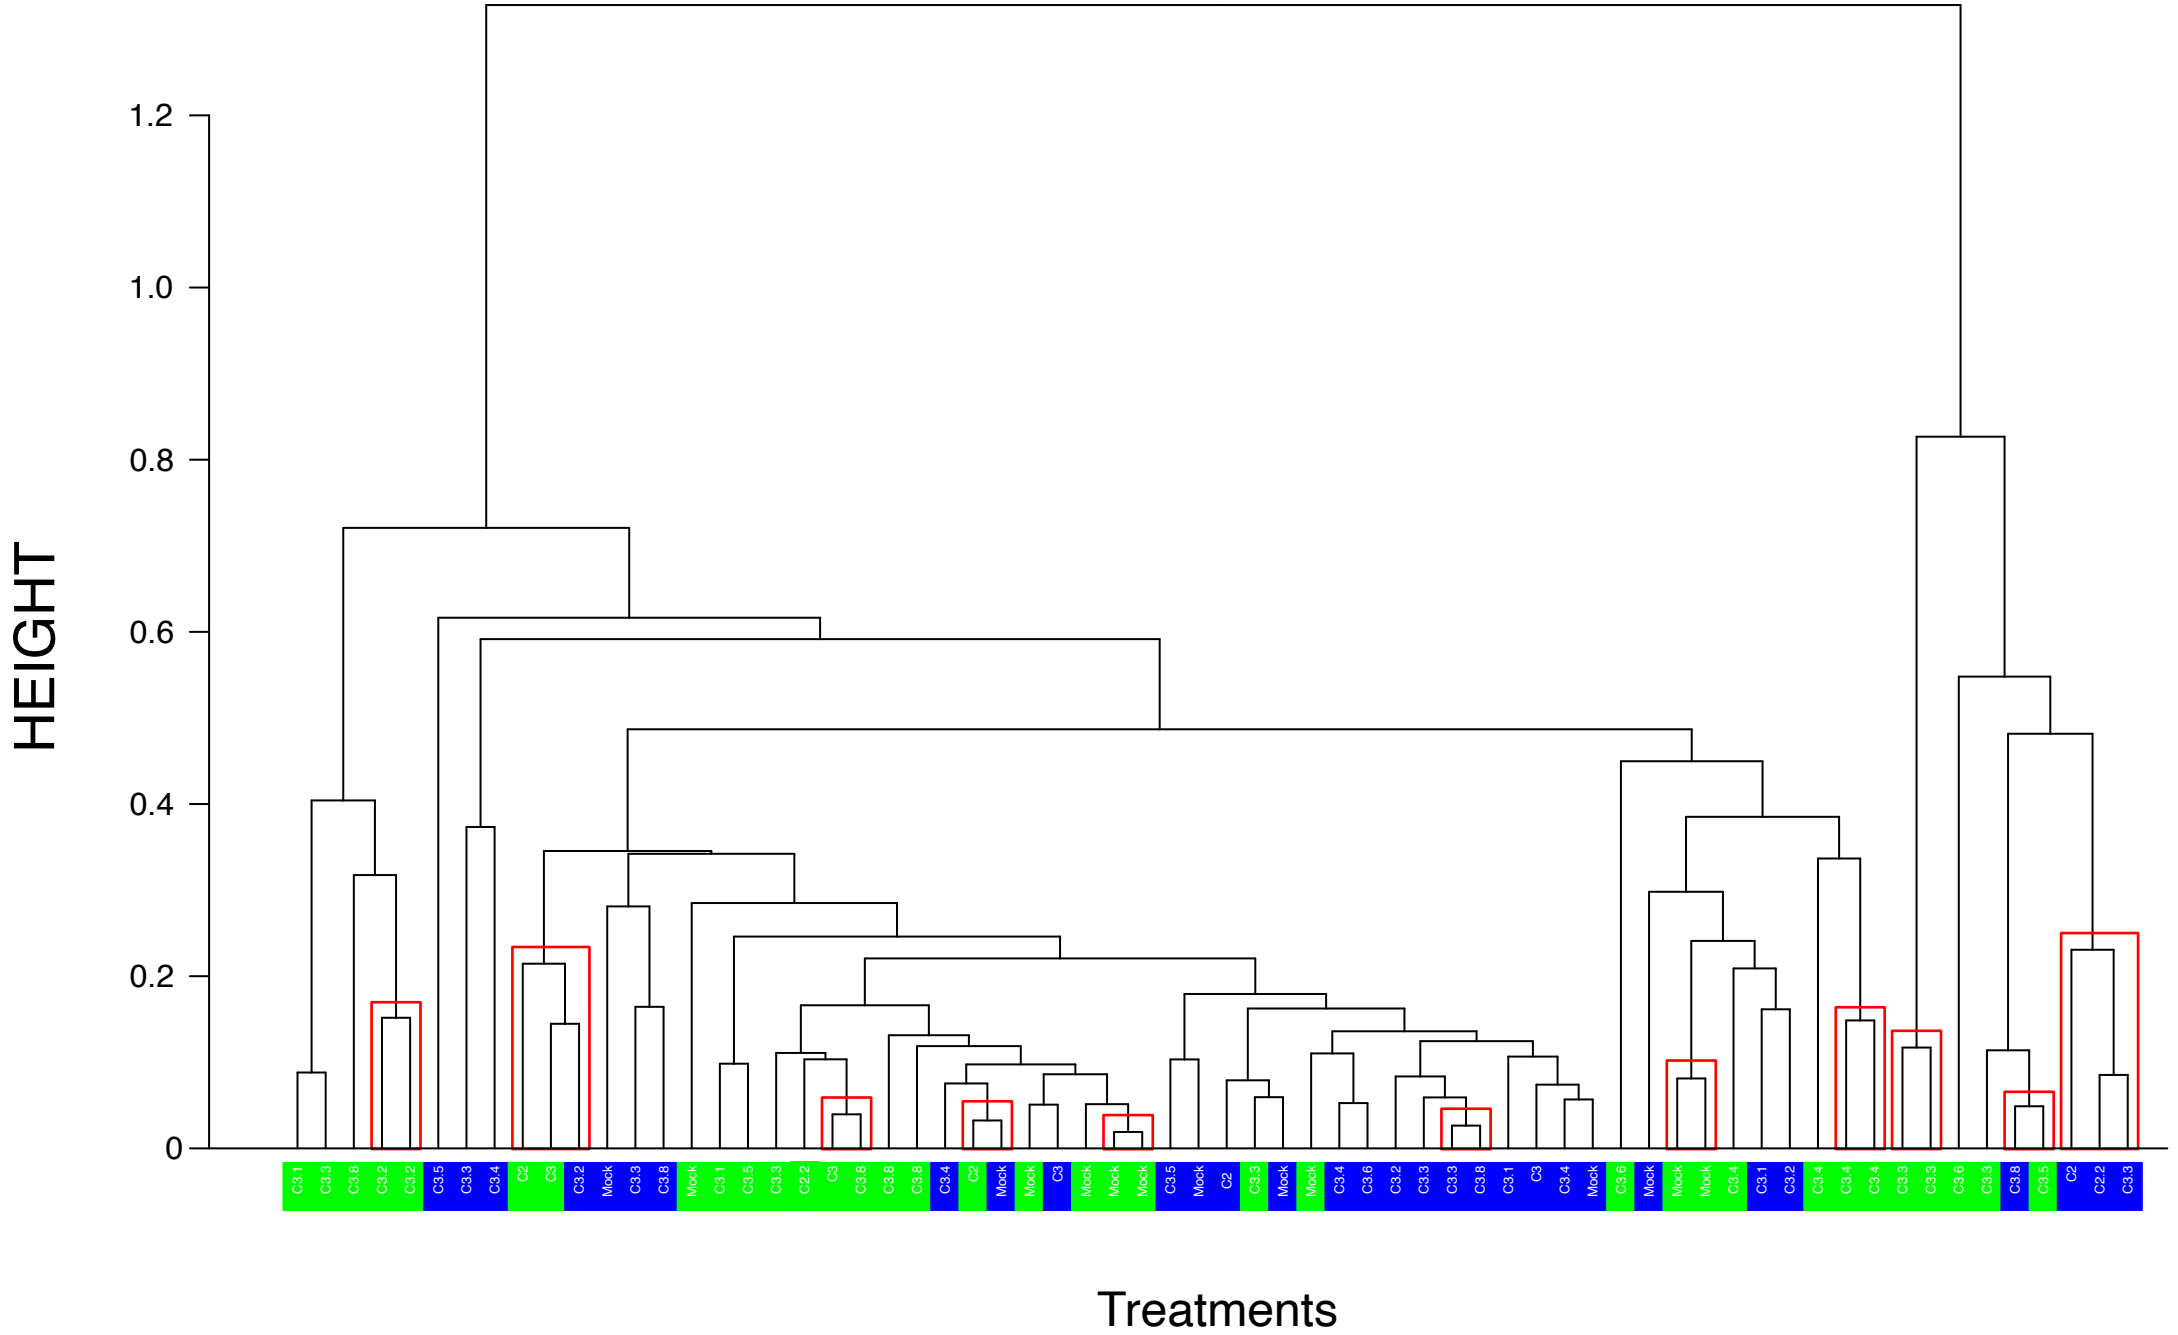

## References

- 1 Rodriguez A, Sanders IR. The role of community and population ecology in applying mycorrhizal fungi for improved food security. *ISME J.* 2015;9:1053-1061.  
615
- 2 Sieverding E (1991). Vesicular-arbuscular mycorrhiza management in tropical agrosystems. Eschborn, Germany. Deutsche Gesellschaft für Technische Zusammenarbeit (GTZ). p. 371.  
620
- 3 FAO (2013). FAOSTAT available at <http://faostat3.fao.org/home/index.html>. FAO publications.: Rome, Italy.
- 4 Savary R, Masclaux FG, Wyss T, Droh G, Cruz Corella J, Machado AP et al. A population genomics approach shows widespread geographical distribution of cryptic genomic forms of the symbiotic fungus *Rhizophagus irregularis*. *ISME J.* 2018;12:17-30.  
625
- 5 Ceballos I, Ruiz M, Fernández C, Peña R, Rodríguez A, Sanders IR. The *in vitro* mass-produced model mycorrhizal fungus, *Rhizophagus irregularis*, significantly increases yields of the globally important food security crop Cassava. *PLoS One.* 2013;8:e70633.  
630
- 6 Koch AM, Kuhn G, Fontanillas P, Fumagalli L, Goudet J, Sanders IR. High genetic variability and low local diversity in a population of arbuscular mycorrhizal fungi. *Proc Nat Acad Sci USA.* 2004;101:2369-2374.  
635
- 7 Croll D, Wille L, Gamper HA, Mathimaran N, Lammers PJ, Corradi N et al. Genetic diversity and host plant preferences revealed by simple sequence repeat and mitochondrial markers in a population of the arbuscular mycorrhizal fungus *Glomus intraradices*. *New Phytol.* 2008;178:672-687.  
640
- 8 Wyss T, Masclaux FG, Rosikiewicz P, Pagni M, Sanders IR. Population genomics reveals that within-fungus polymorphism is common and maintained in populations of the mycorrhizal fungus *Rhizophagus irregularis*. *ISME J.* 2016;10:2514-2526.  
645
- 9 Chen ECH, Morin E, Beaudet D, Noel J, Yildirim G, Ndikumana S et al. High intraspecific genome diversity in the model arbuscular mycorrhizal symbiont *Rhizophagus irregularis*. *New Phytol.* 2018;DOI: 10.1111/nph.14989.  
650
- 10 Koch AM, Croll D, Sanders IR. Genetic variability in a population of arbuscular mycorrhizal fungi causes variation in plant growth. *Ecol Lett.* 2006;9:103-110.  
655
- 11 Ceballos I, Mateus ID, Peña R, Peña-Quemba DC, Robbins C, Ordoñez YM et al. Using variation in arbuscular mycorrhizal fungi to drive the productivity of the food security crop cassava. *BioRxiv.* 2019; <https://doi.org/10.1101/830547>.

- 660 12 Angelard C, Colard A, Niculita-Hirzel H, Croll D, Sanders IR. Segregation in a mycorrhizal fungus alters rice growth and symbiosis-specific gene transcription. *Curr Biol*. 2010;20:1216-1221.
- 665 13 Sanders IR. Sex, plasticity, and biologically significant variation in one Glomeromycotina species. *New Phytol*. 2018;DOI: 10.1111/nph.15049.
- 670 14 Ehinger MO, Croll D, Koch AM, Sanders IR. Significant genetic and phenotypic changes arising from clonal growth of a single spore of an arbuscular mycorrhizal fungus over multiple generations. *New Phytol*. 2012;196:853-861.
- 675 15 Masclaux FG, Wyss T, Mateus-Gonzalez ID, Aletti C, Sanders IR. Variation in allele frequencies at the *bg1 12* locus reveals unequal inheritance of nuclei in a dikaryotic isolate of the fungus *Rhizophagus irregularis*. *Mycorrhiza*. 2018;28:369-377.
- 680 16 Sanders IR. 'Designer' mycorrhizas?: Using natural genetic variation in AM fungi to increase plant growth. *ISME J*. 2010;4:1081-1083.
- 685 17 Masclaux FG, Wyss T, Pagni M, Rosikiewicz P, Sanders IR. Investigating unexplained genetic variation and its expression in the arbuscular mycorrhizal fungus *Rhizophagus irregularis*: A comparison of whole genome and RAD sequencing data. *Plos One*. 2019;<https://doi.org/10.1371/journal.pone.0226497>.
- 690 18 Hart MM, Antunes PM, Chaudhary VB, Abbott LK. Fungal inoculants in the field: Is the reward greater than the risk? *Funct Ecol*. 2017;32:126-135.
- 695 19 Antunes PM, Koch AM, Dunfield KE, Hart MM, Downing A, Rillig MC et al. Influence of commercial inoculation with *Glomus intraradices* on the structure and functioning of an AM fungal community from an agricultural site. *Plant Soil*. 2009;317:257-266.
- 700 20 Renault S, Daoud R, Masse J, Vialle A, Hijri M. Inoculation with *Rhizophagus irregularis* does not alter arbuscular mycorrhizal fungal community structure within the roots of corn, wheat, and soybean crops. *Microorganisms*. 2020;8:83.
- 705 21 Symanczik S, Courty P-E, Boller T, Wiemken A, Al-Yahya'ei MN. Impact of water regimes on an experimental community of four desert arbuscular mycorrhizal fungal (AMF) species, as affected by the introduction of a non-native AMF species. *Mycorrhiza*. 2015;25:639-647.
- 705 22 Janoušková M, Krak K, Vosátka M, Püschel D, Štorchová H. Inoculation effects on root-colonizing arbuscular mycorrhizal fungal communities spread beyond directly inoculated plants. *PLoS One*. 2017;12(7):e0181525. .

*Mycorrhizal fungal communities*

- 710 23 Thioye B, Sanguin H, Kane A, Mania de Faria S, Fall D, Prin Y et al. Impact of mycorrhiza-based inoculation strategies on *Ziziphus mauritiana* Lam. and its native mycorrhizal communities on the route of the Great Green Wall (Senegal). *Ecol Eng.* 2019;128: 66-76.
- 715 24 Koch AM, Antunes PM, Barto EK, Cipollini D, Mummwey DL, Klironomos JN. The effects of arbuscular mycorrhizal (AM) fungal and garlic mustard introductions on native AM fungal diversity. *Biol Inv.* 2011;13:1627–1639.
- 720 25 Loreau M, Naeem S, Inchausti P, Bengtsson J, Grime JP, Hector A et al. Biodiversity and ecosystem functioning: Current knowledge and future challenges. *Science.* 2001;294:804-808.
- 725 26 Weiher E, Freund D, Bunton D, Stefanski A, Lee T, Bentivenga S. Advances, challenges and a developing synthesis of ecological community assembly theory. *Phil Trans Royal Soc B.* 2011;366:2403-2413.
- 730 27 Cadavid F (2011). Manual de nutrición vegetal: una visión de los aspectos nutricionales del cultivo de la yuca (*Manihot esculenta* Crantz). Cali, Colombia. CIAT. p. 175 p.
- 735 28 Lee J, Lee S, Young JPW. Improved PCR primers for the detection and identification of arbuscular mycorrhizal fungi. *FEMS Microbiol Ecol.* 2008;65:339-349.
- 740 29 Simon L, Lalonde M, Bruns TD. Specific amplification of 18S fungal ribosomal genes from vesicular-arbuscular endomycorrhizal fungi colonizing roots. *Appl Environ Microbiol.* 1992;58:291-295.
- 745 30 Helgason T, Daniell TJ, Husband R, Fitter AH, Young JP. Ploughing up the wood-wide web? *Nature.* 1998;394:431.
- 750 31 Pagni M, Niculita-Hirzel H, Pellissier L, Dubuis A, Xenarios I, Guisan A et al. Density-based hierarchical clustering of pyro-sequences on a large scale—the case of fungal ITS1. *Bioinformatics.* 2013;29:1268-1274.
- 755 32 Hubert L, Arabie P. Comparing partitions. *J Classif.* 1985;2:193-218.
- 33 Krüger M, Krüger C, Walker C, Stockinger H, Schüssler A. Phylogenetic reference data for systematics and phylotaxonomy of arbuscular mycorrhizal fungi from phylum to species level. *New Phytol.* 2012;193:970-984.
- 34 Katoh K, Standley DM. MAFFT Multiple Sequence Alignment Software Version 7: Improvements in Performance and Usability. *Mol Biol Evol.* 2013;30:772-780.
- 35 Suzuki R, Shimodaira H. PvcLust: an R package for assessing the uncertainty in hierarchical clustering. *Bioinformatics.* 2006;22:1540-1542.
